# Supplementary material
Source: publisher figshare collection journal article supplement (https://acs.figshare.com/ndownloader/files/11449304)
Supplement: Supplementary file 1 [file 11449304]

## **Supplementary Data**

### **Vancomycin Analogue Restores Meropenem Activity against NDM-1 Gram-negative Pathogens**

Venkateswarlu Yarlagadda<sup>†</sup>, Paramita Sarkar<sup>†</sup>, Sandip Samaddar<sup>†</sup>, Goutham Belagula Manjunath<sup>†</sup>, Susweta Das Mitra<sup>‡</sup>, Krishnamoorthy Paramanandham<sup>‡</sup>, Bibek Ranjan Shome<sup>‡</sup>, and Jayanta Haldar<sup>\*,†</sup>

<sup>†</sup>Antimicrobial Research Laboratory, New Chemistry Unit, Jawaharlal Nehru Centre for Advanced Scientific Research, Jakkur, Bengaluru 560064, Karnataka, India.

<sup>‡</sup>National Institute of Veterinary Epidemiology and Disease Informatics (NIVEDI) Yelahanka, Bengaluru 560064, Karnataka, India.

#### **Table of Contents**

Page S2-S3: Supplementary Figures

Page S4: Supplementary Tables

## I. Supplementary Figures

**Figure S1. Schematic representation of agarose gel (2%) showing the 475 bp amplified product by conventional polymerase chain reaction.** Lane 1, 100 bp DNA ladder; Lane 2, positive control- NDM-1 producing *K. pneumoniae* (ATCC-BAA-2146); Lane 3, negative control- *E. coli* (ATCC-25922); Lane 4, *E. coli* R3336 confirm the NDM-1 gene, Lane 5, multi-drug resistant (MDR) *K. pneumoniae* R3421 which was negative for NDM-1 gene; Lane 6, *K. pneumoniae* R3949 and Lane 7, *K. pneumoniae* R3934 confirm the NDM-1 gene.

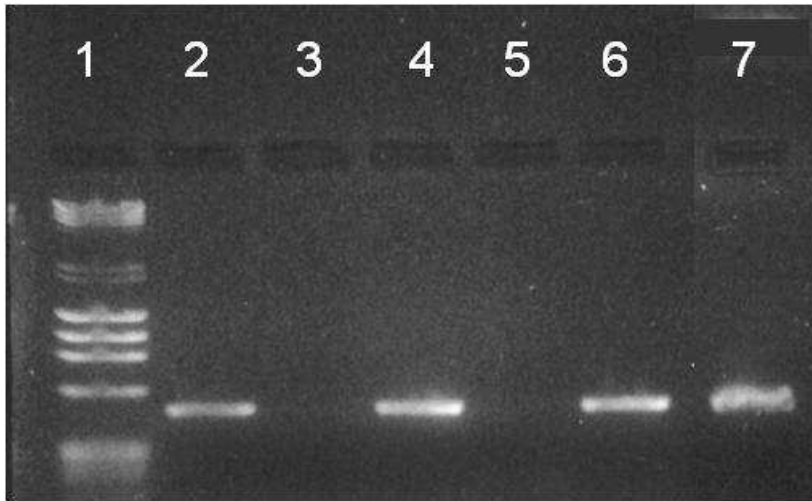

**Figure S2.** The complex formation of Dipi-van with  $\text{Zn}^{2+}$  (Incubation of Dipi-van with zinc sulfate). Structure of  $\text{Dipi-van-Zn}^{2+}\cdot 2\text{H}_2\text{O}$  and the complex confirmed by mass-spectrometry.

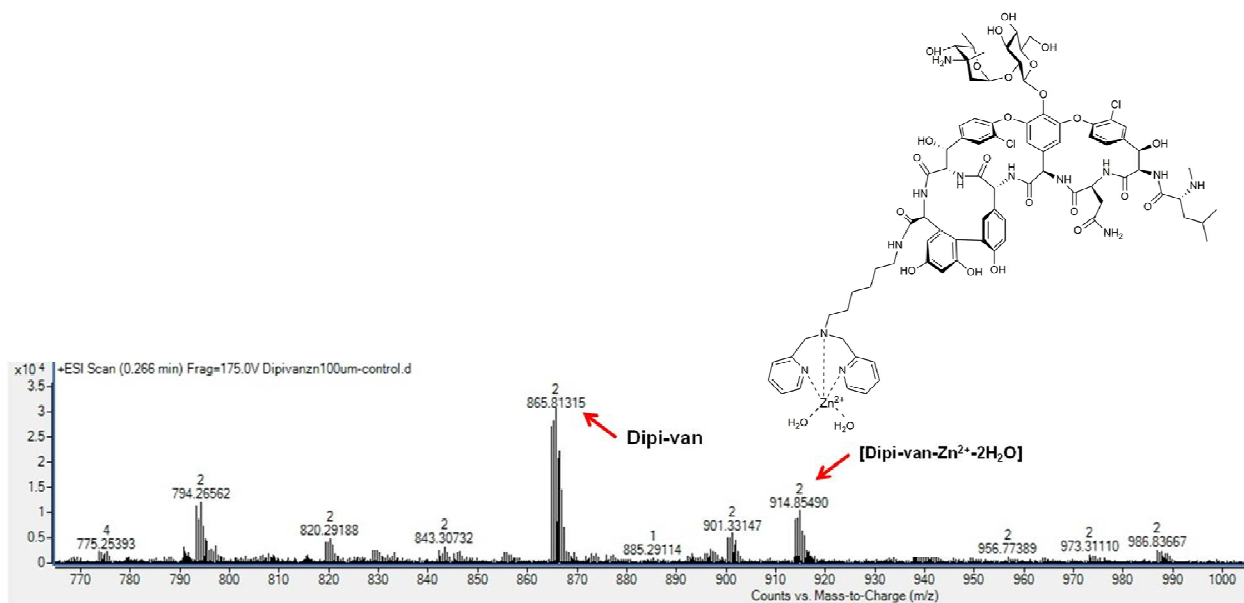

**Figure S3.** The complex formation of Dipi-van with  $\text{Zn}^{2+}$  from NDM-1 enzyme (Incubation of Dipi-van with NDM-1 enzyme). Presence of  $\text{Dipi-van-Zn}^{2+}\cdot 2\text{H}_2\text{O}$  confirms the depletion of metal ion from the enzyme by Dipi-van.

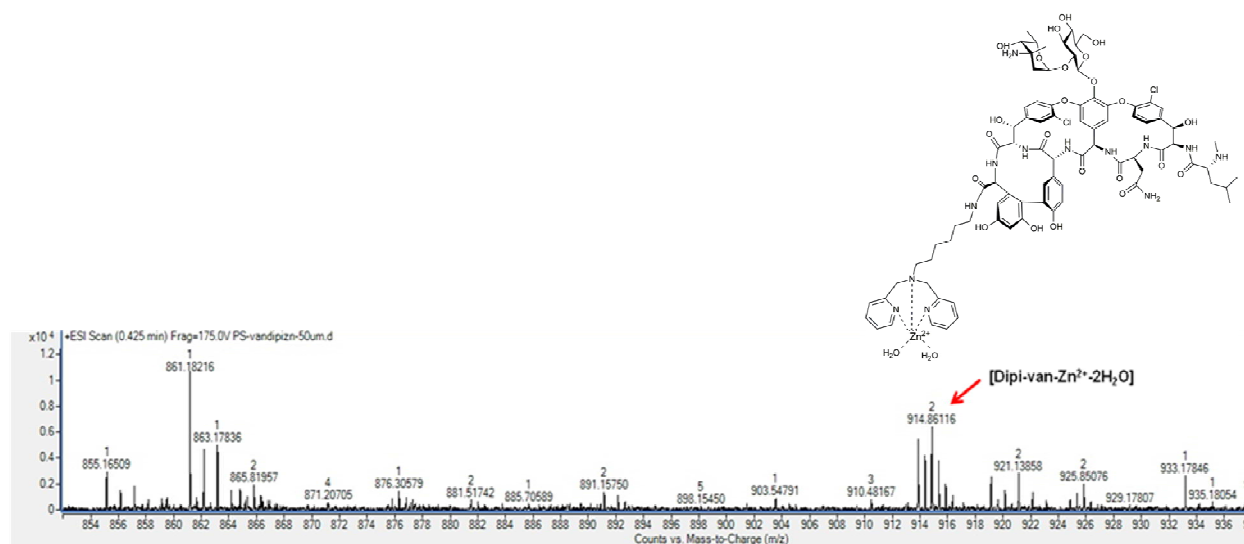

## II. Supplementary Tables

**Table S1.** Antibacterial activity of common antibiotics against carbapenem-resistant NDM-1 positive Gram-negative clinical isolates

| NDM-1 expressing bacteria         | Minimum Inhibitory Concentration (µg/mL) |             |               |              |           |             |
|-----------------------------------|------------------------------------------|-------------|---------------|--------------|-----------|-------------|
|                                   | Colistin                                 | Tigecycline | Ciprofloxacin | Erythromycin | Kanamycin | Minocycline |
| <i>K. pneumoniae</i> R3949        | 0.5                                      | 0.5         | >250          | >250         | >250      | 32          |
| <i>K. pneumoniae</i> R3934        | 0.5                                      | 0.5         | >250          | >250         | >250      | 62          |
| <i>K. pneumoniae</i> ATCC BAA2146 | 0.5                                      | 0.5         | >250          | 125          | >250      | 62          |
| <i>E. coli</i> R3336              | 0.5                                      | 0.5         | 125           | >250         | >250      | 32          |

**Table S2.** Antibacterial efficacy of meropenem with or without Dipi against NDM-1 positive clinical isolates

| NDM-1 expressing bacteria         | Minimum Inhibitory Concentration (µg/mL) |                 |
|-----------------------------------|------------------------------------------|-----------------|
|                                   | - Dipi                                   | + Dipi (100 µM) |
| <i>K. pneumoniae</i> R3949        | >100                                     | 50              |
| <i>K. pneumoniae</i> R3934        | >100                                     | >50             |
| <i>K. pneumoniae</i> ATCC BAA2146 | >100                                     | 50              |
| <i>E. coli</i> R3336              | >100                                     | >50             |
